P2865

### Mutation specific clinical characteristics in long QT syndrome type 8; severe phenotype in Timothy syndrome patients

S. Ohno<sup>1</sup>, M. Yoshinaga<sup>2</sup>, J. Ozawa<sup>3</sup>, M. Fukuyama<sup>4</sup>, S. Seichi<sup>5</sup>, A. Kashiwa<sup>6</sup>, K. Yasuda<sup>7</sup>, S. Kaneko<sup>8</sup>, K. Nakau<sup>9</sup>, S. Inukai<sup>10</sup>, H. Sakazaki<sup>11</sup>, T. Makiyama<sup>6</sup>, T. Aiba<sup>1</sup>, H. Suzuki<sup>12</sup>, M. Horie<sup>4</sup>

<sup>1</sup>National Cerebral and Cardiovascular Center, Osaka, Japan; <sup>2</sup>National Hospital Organization Kagoshima Medical Center, Kagoshima, Japan; <sup>3</sup>Niigata University Graduate School of Medical and Dental Sciences, Niigata, Japan; <sup>4</sup>Shiga University of Medical Science, Otsu, Japan; <sup>5</sup>Okinawa Children's Medical Center, Haibaru, Japan; <sup>6</sup>Kyoto University Graduate School of Medicine, Department of Cardiovascular Medicine, Kyoto, Japan; <sup>7</sup>Aichi Children's Health and Medical Center, Daifu, Japan; <sup>8</sup>Seirei Hamamatsu General Hospital, Hamamatsu, Japan; <sup>9</sup>Asahikawa Medical University, Asahikawa, Japan; <sup>10</sup>Nagoya Daini Red Cross Hospital, Nagoya, Japan; <sup>11</sup>Hyogo Prefectural Amagasaki General Medical Center, Amagasaki, Japan; <sup>12</sup>Uonuma Kikan Hospital, Minamiuonuma, Japan

**Background:** Long QT syndrome type 8 (LQT8) caused by mutations in CACNA1C has been classified as a very rare and severe type of long QT syndrome accompanied with Timothy syndrome (TS) with extra-cardiac phenotype. Recently, various mutations in CACNA1C have been identified in non-TS patients. However, mutation specific severity in LQT8 has not been elucidated yet, especially for non-TS patients.

**Purpose:** We aimed to clarify the clinical characteristics of LQT8 patients.

**Methods:** The study consists of 26 LQT8 patients (21 probands and 5 family members). We evaluated their phenotype.

**Results:** Table summarizes the clinical characteristics of LQT8 patients. TS patients diagnosed in younger age than those of non-TS. Four TS and one non-TS patients were diagnosed at the age of 0, though the non-TS

patient was a son of a patient and asymptomatic. Nine patients suffered symptoms including 7 with cardiac arrest. We identified three TS mutations; classical p.G406R in two and p.G402S in two, and a new TS mutation, p.412M in one. Four of TS patients were symptomatic and two died suddenly at the age of 4 and 5. In contrast, no one died in non-TS patients. Five non-TS patients suffered symptoms in the age of 4,9,15,54 and 64, and the mutations were p.S643F, p.R858H (2 patients), p.K1518E and p.K1591T.

**Conclusions:** Although TS patients showed severe phenotype, most of the non-TS patients were asymptomatic. The phenotype in LQT8 are diversely different depend on the mutations, especially between patients with TS and non-TS.

Characteristics of TS and non-TS patient

|                     | TS      | Non-TS      | P      |
|---------------------|---------|-------------|--------|
| N (male)            | 5 (2)   | 21 (9)      |        |
| Age (range)         | 0 (0-7) | 12 (0-64)   | 0.004  |
| Symptom             |         |             |        |
| Syncope             | 4       | 5           | 0.034  |
| CPA                 | 3       | 4           | 0.101  |
| ECG characteristics |         |             |        |
| QT interval         | 603±40  | 507±14      | 0.011  |
| T wave alternans    | 5       | 2           | <0.001 |
| AV Block            | 4       | 1           | 0.002  |
| Therapy             |         | (4 unknown) |        |
| Beta-blocker        | 4       | 7           | 0.311  |
| Mexiletine          | 3       | 1           | 0.024  |
| ICD implantation    | 2       | 2           | 0.21   |
